# Supplementary material for: Genome wide DNA methylation landscape reveals glioblastoma’s influence on epigenetic changes in tumor infiltrating CD4+ T cells
Source: PubMed Central journal article supplement (PMC8121608; doi:10.18632/oncotarget.27955), 2021-05-11
Supplement: oncotarget-12-967-s001.pdf [file oncotarget-12-967-s001.pdf]

# Genome wide DNA methylation landscape reveals glioblastoma's influence on epigenetic changes in tumor infiltrating CD4+ T cells

## SUPPLEMENTARY MATERIALS

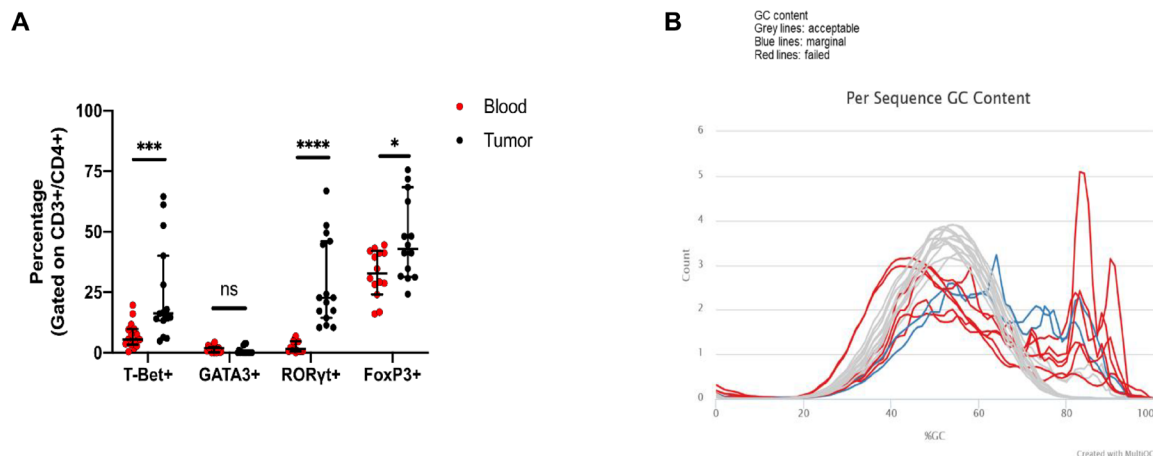

**C**

### Mapping Statistics

|                    | Pt_10_Blood | Pt_10_Tumor | Pt_12_Blood | Pt_12_Tumor | Pt_13_Blood | Pt_13_Tumor | Pt_8_Blood | Pt_8_Tumor | Pt_9_Blood | Pt_9_Tumor |
|--------------------|-------------|-------------|-------------|-------------|-------------|-------------|------------|------------|------------|------------|
| Raw reads          | 32,875,234  | 31,965,901  | 35,777,966  | 39,999,860  | 35,382,843  | 32,584,937  | 38,389,674 | 31,471,844 | 33,149,386 | 34,742,111 |
| Mapped reads       | 11,671,333  | 12,459,808  | 14,226,717  | 22,297,971  | 15,205,408  | 26,800,922  | 14,283,486 | 14,635,059 | 11,953,270 | 12,079,359 |
| High quality reads | 10,729,765  | 11,689,280  | 13,311,118  | 21,157,713  | 14,284,822  | 26,407,504  | 13,367,376 | 13,807,697 | 10,965,133 | 11,153,847 |
| Mapped to gene     | 679,483     | 1,593,489   | 2,342,223   | 9,943,621   | 1,613,553   | 2,102,247   | 811,500    | 657,595    | 687,016    | 724,492    |
| coding             | 217,046     | 221,406     | 82,843      | 141,519     | 137,430     | 218,272     | 302,346    | 218,572    | 208,768    | 245,257    |
| coding-rev         | 232,234     | 595,359     | 748,736     | 4,125,451   | 363,736     | 776,781     | 308,236    | 232,770    | 238,077    | 254,407    |
| intergenic         | 5,012,275   | 4,896,920   | 2,748,197   | 3,882,942   | 4,695,720   | 13,200,727  | 6,437,716  | 6,995,269  | 5,092,376  | 5,332,952  |
| intron             | 2,207,456   | 2,061,279   | 982,555     | 1,176,639   | 1,796,242   | 4,163,824   | 2,844,597  | 2,936,924  | 2,199,541  | 2,396,452  |
| intron-rev         | 2,145,779   | 2,233,537   | 2,051,526   | 5,355,184   | 2,260,536   | 6,304,074   | 2,741,449  | 2,793,616  | 2,146,628  | 2,297,822  |
| junction           | 10,559      | 252,875     | 497,705     | 2,579,368   | 186,227     | 388,239     | 3,903      | 11,202     | 19,242     | 7,476      |
| mitochondrial      | 335,179     | 562,664     | 5,005,507   | 880,406     | 3,618,963   | 252,822     | 944        | 9,011      | 478,957    | 14,505     |
| other-exon         | 28,040      | 31,771      | 35,689      | 65,045      | 55,269      | 56,774      | 35,148     | 31,831     | 28,922     | 30,411     |
| other-exon-rev     | 50,305      | 166,502     | 528,933     | 1,626,524   | 598,435     | 170,410     | 36,956     | 34,573     | 39,380     | 32,642     |
| promoter           | 132,799     | 137,764     | 110,801     | 119,435     | 126,748     | 190,772     | 173,696    | 147,684    | 140,177    | 144,966    |
| promoter-rev       | 121,927     | 166,940     | 124,383     | 174,306     | 132,218     | 193,071     | 168,496    | 137,986    | 124,847    | 135,743    |
| coding%            | 2.02        | 1.89        | 0.62        | 0.67        | 0.96        | 0.83        | 2.26       | 1.58       | 1.90       | 2.20       |
| coding-rev%        | 2.16        | 5.09        | 5.62        | 19.50       | 2.55        | 2.94        | 2.31       | 1.69       | 2.17       | 2.28       |
| intergenic%        | 46.71       | 41.89       | 20.65       | 18.35       | 32.87       | 49.99       | 48.16      | 50.66      | 46.44      | 47.81      |
| intron%            | 20.57       | 17.63       | 7.38        | 5.56        | 12.57       | 15.77       | 21.28      | 21.27      | 20.06      | 21.49      |
| intron-rev%        | 20.00       | 19.11       | 15.41       | 25.31       | 15.82       | 23.87       | 20.51      | 20.23      | 19.58      | 20.60      |
| junction%          | 0.10        | 2.16        | 3.74        | 12.19       | 1.30        | 1.47        | 0.03       | 0.08       | 0.18       | 0.07       |
| mitochondrial%     | 3.12        | 4.81        | 37.60       | 4.16        | 25.33       | 0.96        | 0.01       | 0.07       | 4.37       | 0.13       |
| other-exon%        | 0.26        | 0.27        | 0.27        | 0.31        | 0.39        | 0.21        | 0.26       | 0.23       | 0.26       | 0.27       |
| other-exon-rev%    | 0.47        | 1.42        | 3.97        | 7.69        | 4.19        | 0.65        | 0.28       | 0.25       | 0.36       | 0.29       |
| promoter%          | 1.24        | 1.18        | 0.83        | 0.56        | 0.89        | 0.72        | 1.30       | 1.07       | 1.28       | 1.30       |
| promoter-rev%      | 1.14        | 1.43        | 0.93        | 0.82        | 0.93        | 0.73        | 1.26       | 1.00       | 1.14       | 1.22       |
| Mapped to gene %   | 6.33        | 13.63       | 17.60       | 47.00       | 11.30       | 7.96        | 6.07       | 4.76       | 6.27       | 6.50       |

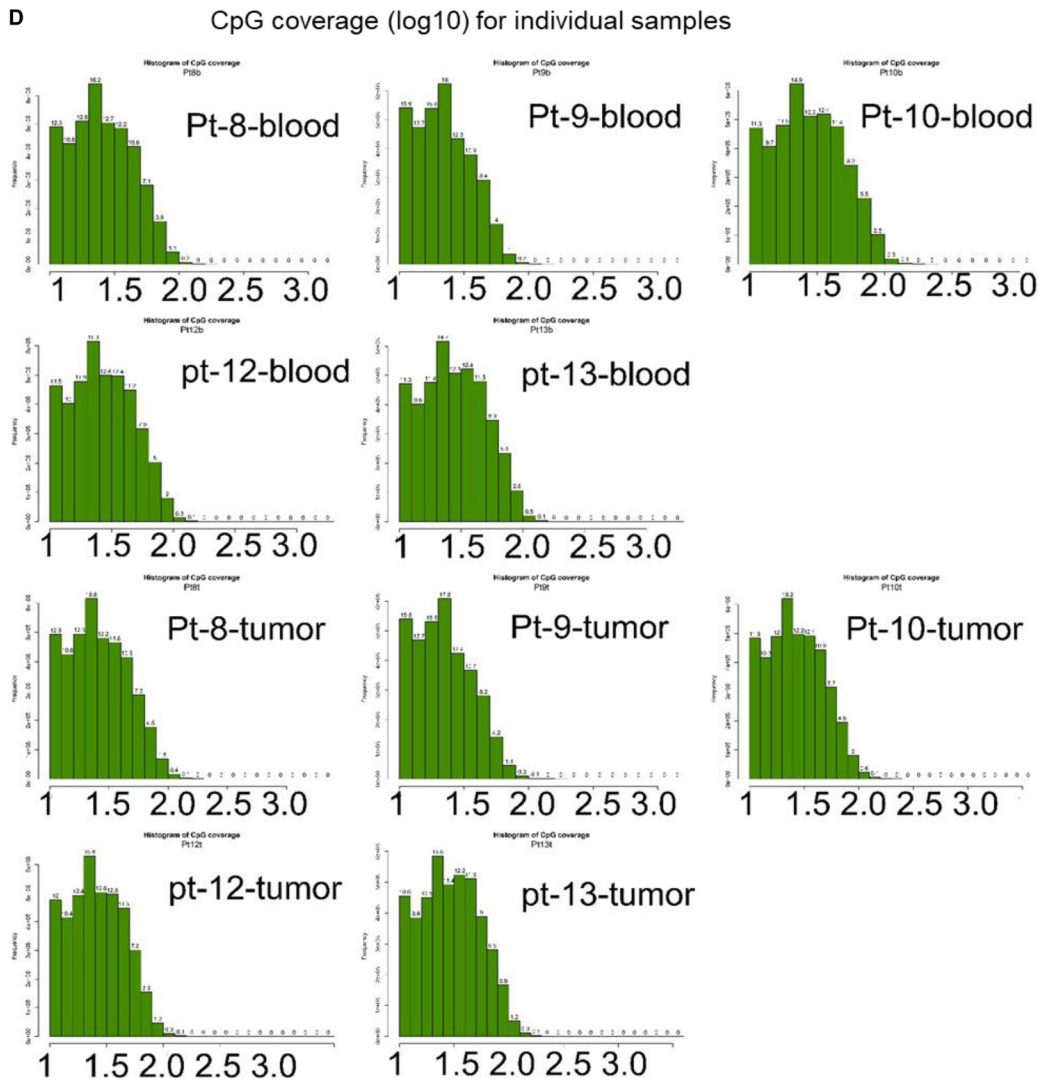

**Supplementary Figure 1:** (A) Flow cytometry data showing percentages of different subpopulations of CD4<sup>+</sup> T cells in the GBM tumor infiltrating lymphocytes (black dots) compared to the blood (red dots) from the same individuals. Each dot represents an individual included in the analysis. We performed whole genome bisulfite sequencing of DNA samples from GBM tumor infiltrating CD4<sup>+</sup> T cells and also from blood of the same individuals. (B–D) GC content in the sequencing data, mapping statistics and CpG coverage for each individual, respectively. The data obtained from bisulfite sequencing was analyzed in house in the Department of Bioinformatics, Indiana University School of Medicine, Indiana. The table provides information on mapping stats of all individual samples, hyper and hypomethylated regions in tumor samples etc.

**Supplementary Table 1: Top 10 significant DMRs and their associated genes in tumor CD4<sup>+</sup> T cells compared to blood CD4<sup>+</sup> T cells. See Supplementary Table 1**
